# Supplementary material for: Technical note: Adaptably diagnosing O 3 -NO x -VOC sensitivity evolution with routine pollution and meteorological data
Source: Copernicus journal article supplement (doi:10.5194/egusphere-2025-1596), 2025-04-29
Supplement: Supplementary file 1 [file egusphere-2025-1596-supplement.pdf]

# Technical note: Adaptably diagnosing O<sub>3</sub>-NO<sub>x</sub>-VOC sensitivity evolution with routine pollution and meteorological data

Minjuan Huang<sup>1,2</sup>\*, Tengchao Liao<sup>1,2</sup>

1. School of Atmospheric Sciences, Sun Yat-sen University, and Southern Marine Science and Engineering Guangdong Laboratory (Zhuhai), Zhuhai 519082, PR China

2. Guangdong Provincial Observation and Research Station for Climate Environment and Air Quality Change in the Pearl River Estuary, Key Laboratory of Tropical Atmosphere-Ocean System (Sun Yat-sen University), Ministry of Education, Zhuhai, 519082, PR China

\* Corresponding author's e-mail: [hminjuan@mail.sysu.edu.cn](mailto:hminjuan@mail.sysu.edu.cn)

## 1 S1. Comparison of fitting significance amongst parametric models

2 Although all the *log-Poly2* fits (Equation 7) were convergent and effective, quite  
3 certain portion of them did not achieve the statistical significance ( $p > 0.1$ ) (Figures  
4 S11-S12 (g)). The other six models (Equations 1-6) generally performed well in  
5 capturing the maximum DPO<sub>3</sub> and partition point, with most fits achieving the  
6 statistical significance ( $p \leq 0.1$ ) for the parameters  $d$  (representing the maximum DPO<sub>3</sub>)  
7 as well as  $X_o$ ,  $\log(X)_o$  and  $e$  (indicative of the partition points) (Figures S11-S12 (a-f)).  
8 The regression of the parameter  $b$ , related to the curve width, was generally more  
9 statistically significant based on the *log-Bragg3* and *log-Lorentz3* models (Figures S11-  
10 S12 (c, e)). The baseline of the DPO<sub>3</sub>-NO<sub>2</sub> (or NO<sub>x</sub>) diagram is expected to be near  
11 zero; and only the *log-Bragg4* and *log-Lorentz4* models incorporate the curve baseline  
12 related parameter  $c$ . However, both the regressing baselines varied significantly across  
13 fits and regions (Figures S2-S6 and S8-S9 (d, f)), and quite portion of them did not  
14 exhibit statistically significant ( $p > 0.1$ ) (Figures S11-S12 (d, f)). Amongst all models,  
15 only the *Beta* and *log-Beta* models can fit a skew curve; and they are confined by both  
16 the minimum and maximum thresholds of NO<sub>2</sub> (or NO<sub>x</sub>), represented by the parameters  
17 of  $X_b$  (or  $\log(X)_b$ ) and  $X_c$  (or  $\log(X)_c$ ), respectively. However, most of the regressions  
18 for these parameters were not statistically significant ( $p > 0.1$ ) (Figures S11- S12 (a, b)).  
19 In summary, the *log-Bragg3* and *log-Lorentz3* models were the most statistically  
20 significant in characterizing the regular DPO<sub>3</sub>-NO<sub>x</sub> (or NO<sub>2</sub>) relation, with over 95% of  
21 fits achieving the statistical significance ( $p < 0.1$ ) (Figures S11-S12 (c, e)).

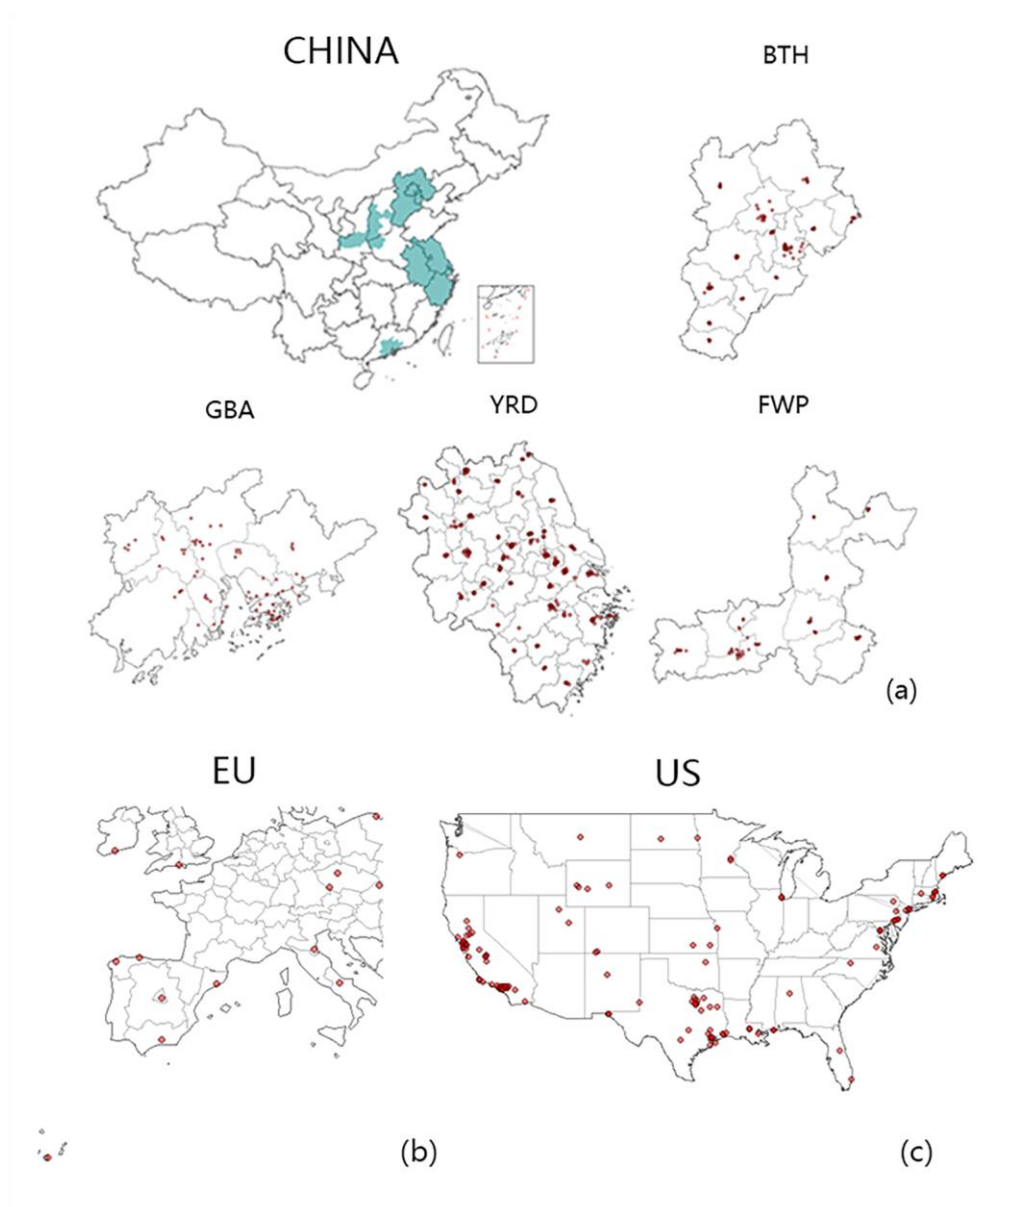

Figure S1 Locations of the studied pollution monitoring stations

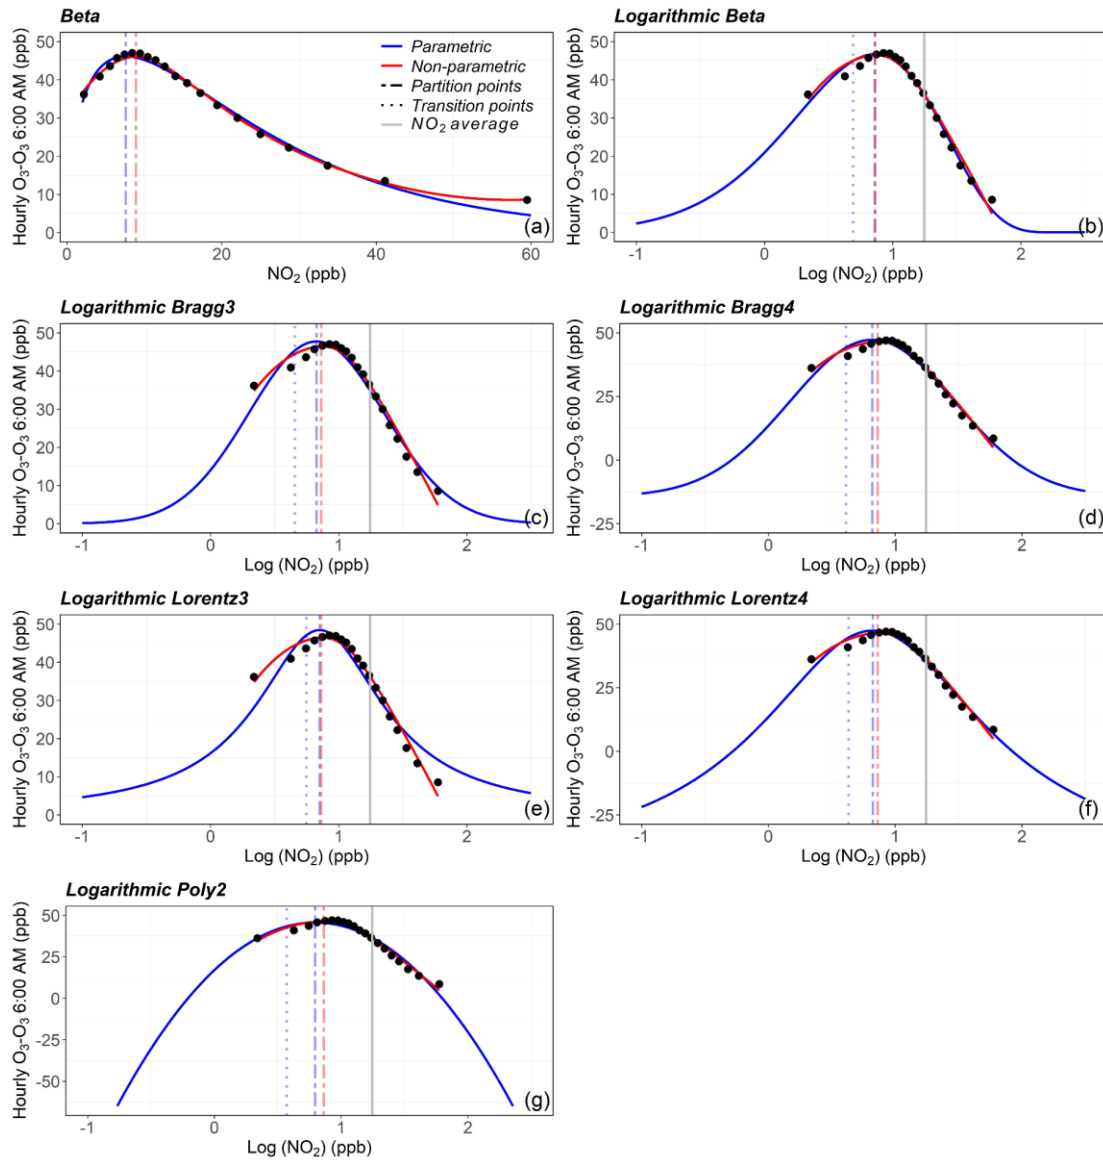

24

25 Figure S2 The **DPO<sub>3</sub>-NO<sub>2</sub>** curves for the **BTH** region (2014-2019) individually fitted

26 by the studied models (Equations 1-7)

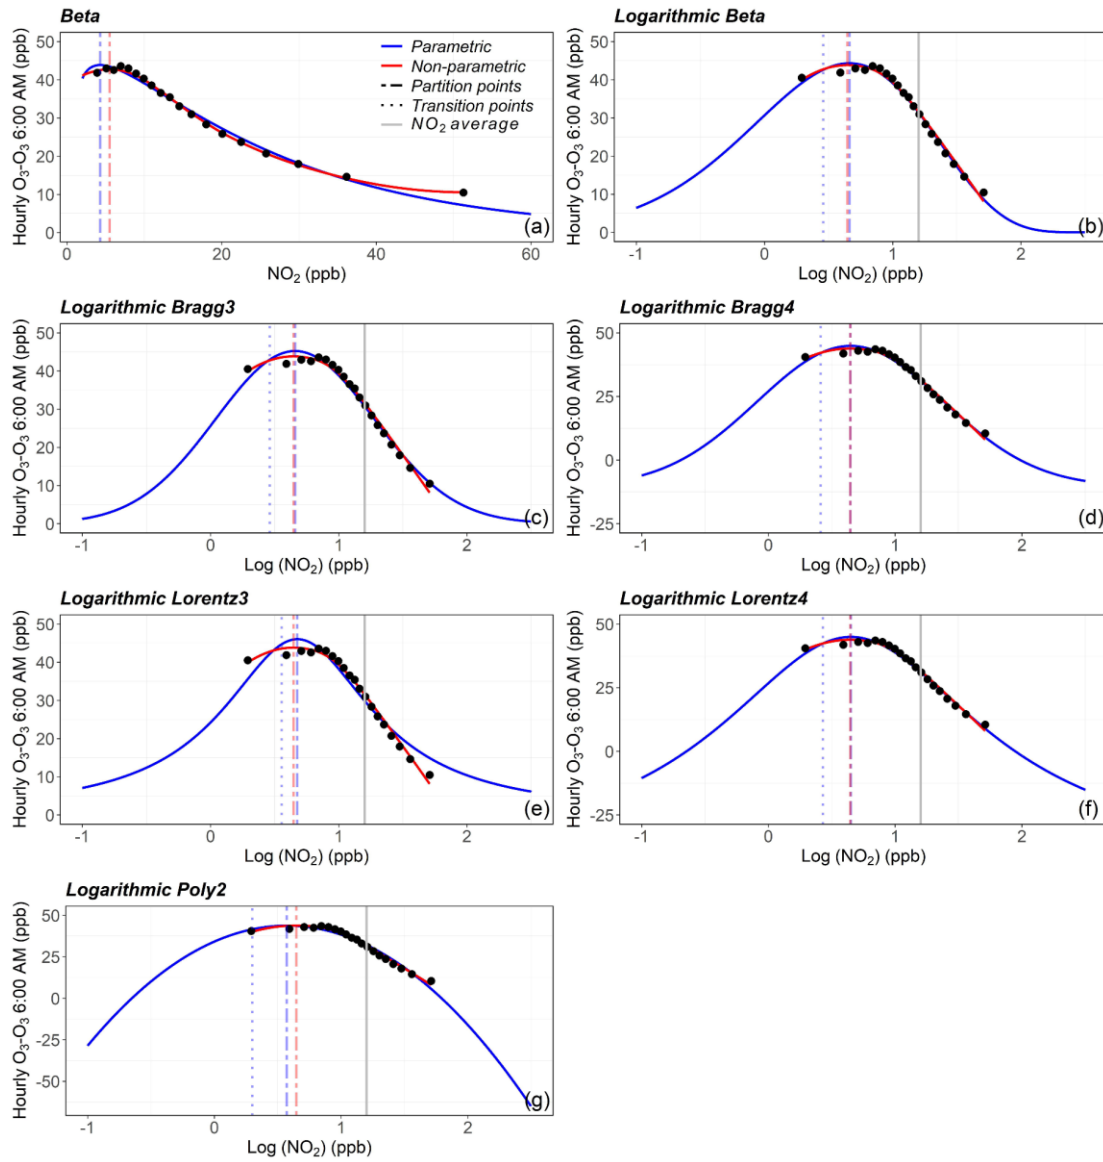

27

28 Figure S3 The  $DPO_3-NO_2$  curves for the FWP region (2014-2019) individually fitted

29 by the studied models (Equations 1-7)

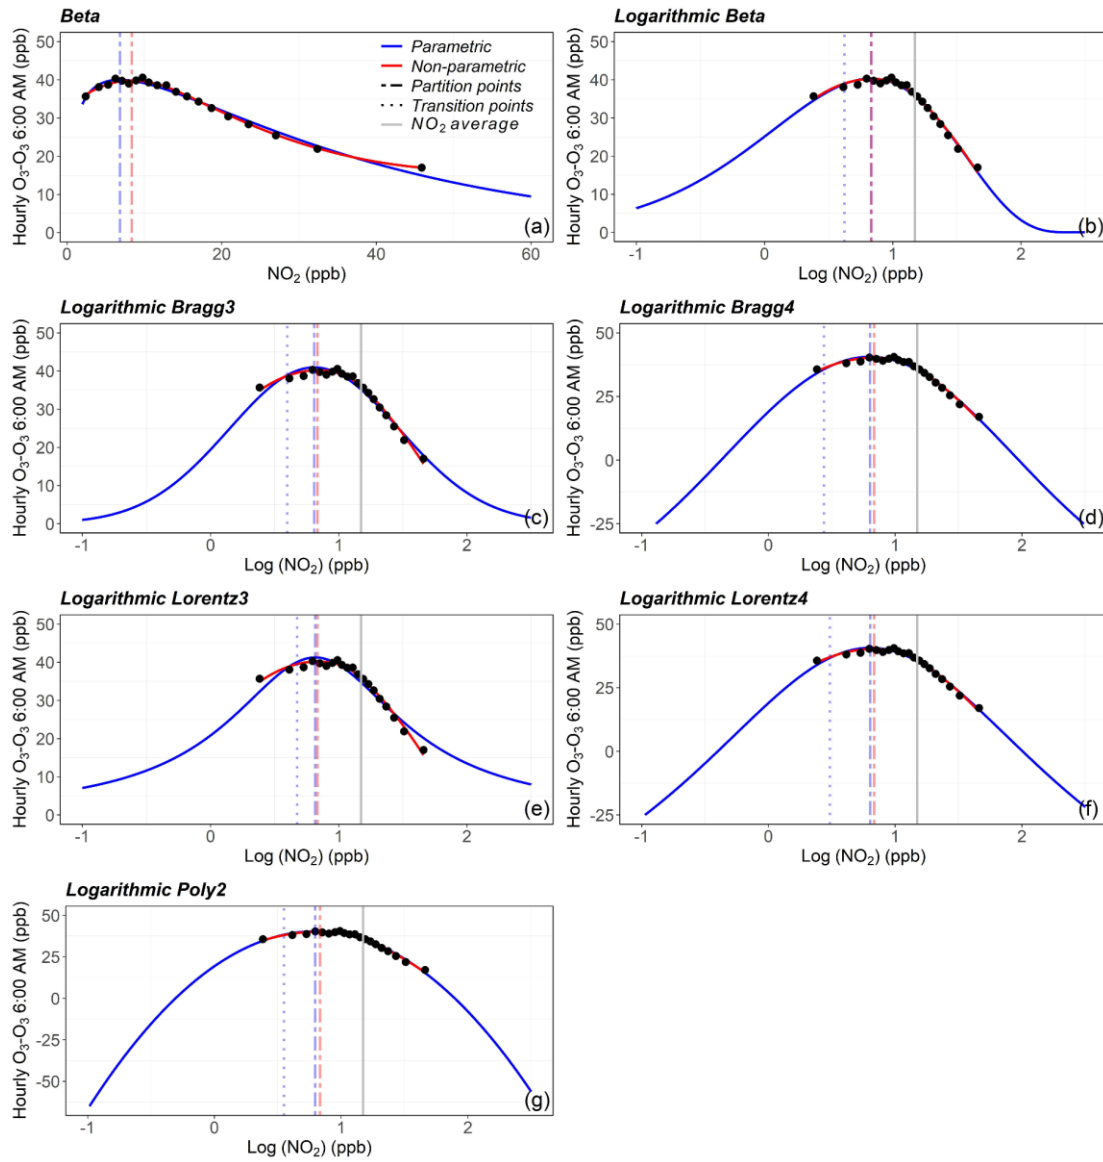

30

31 Figure S4 The  $DPO_3-NO_2$  curves for the YRD region (2014-2019) individually fitted

32 by the studied models (Equations 1-7)

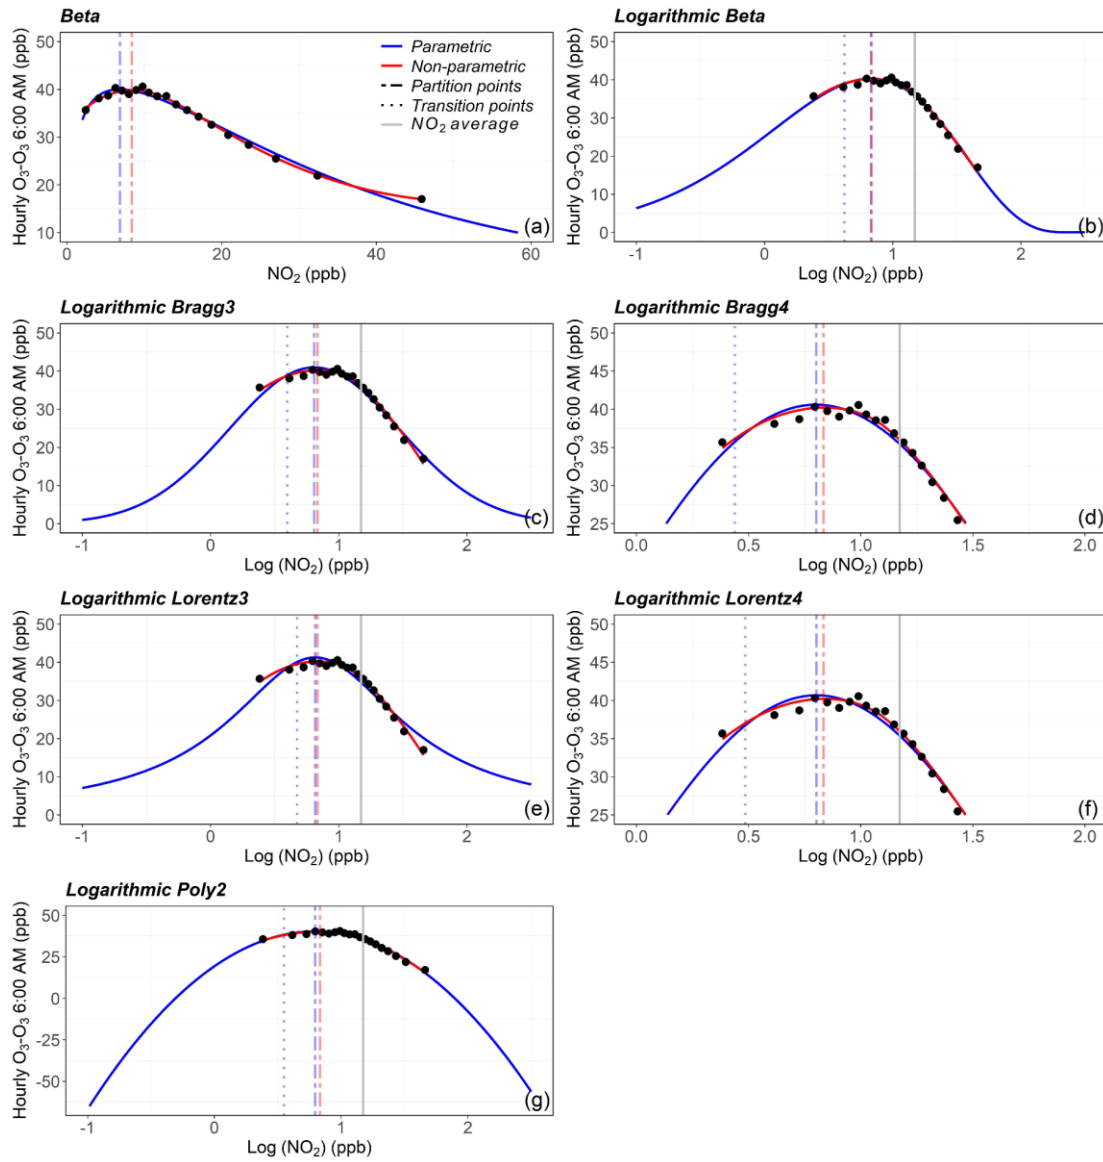

33

34 Figure S5 The  $DPO_3-NO_2$  curves for the PRD region (2014-2019) individually fitted

35 by the studied models (Equations 1-7)

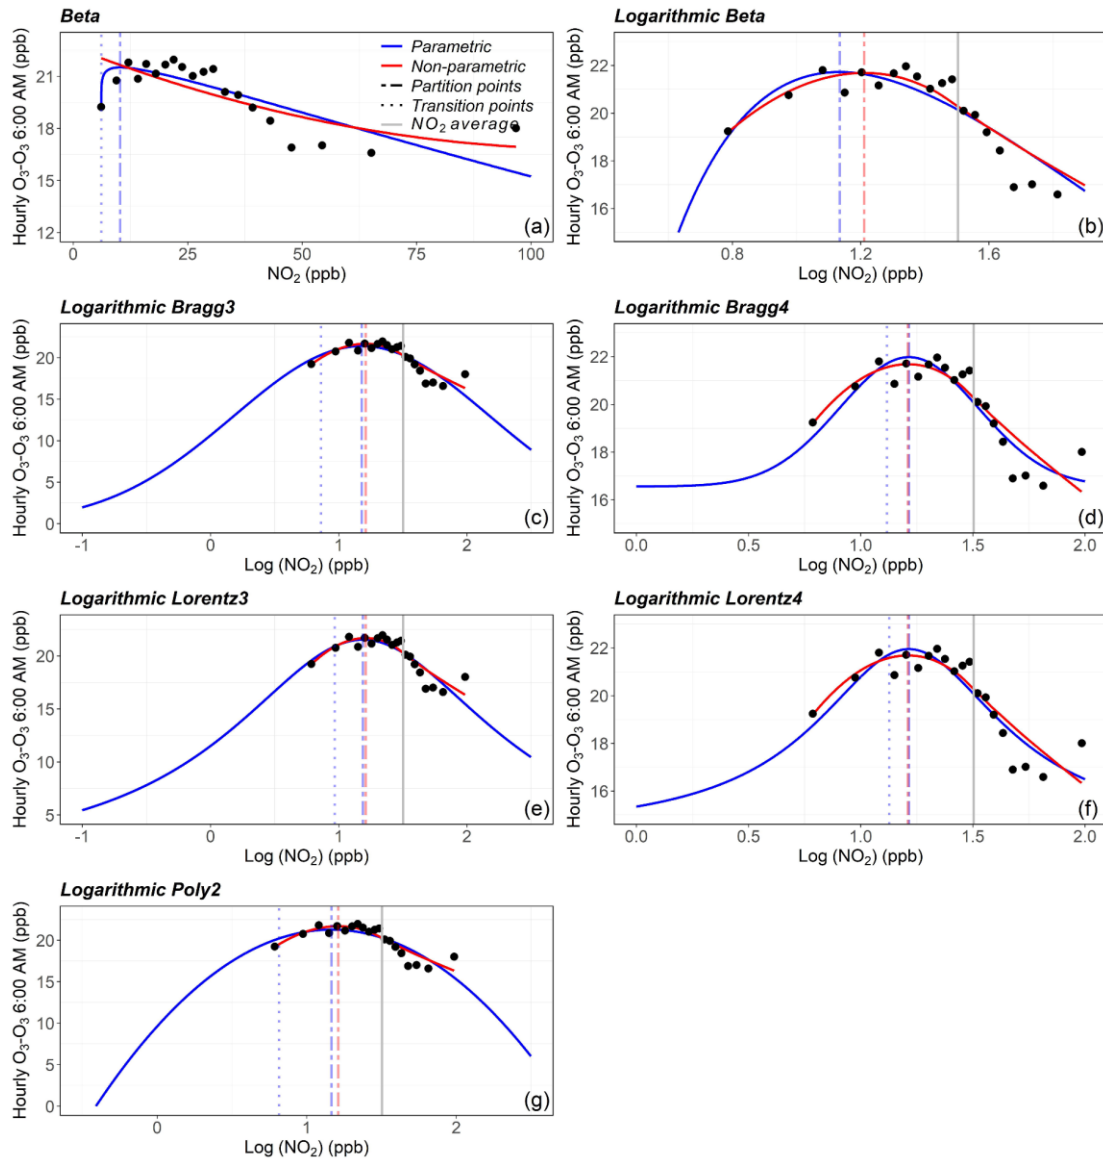

36

37 Figure S6 The **DPO<sub>3</sub>-NO<sub>2</sub>** curves for the **Hong Kong** (2014-2019) individually fitted

38 by the studied models (Equations 1-7)



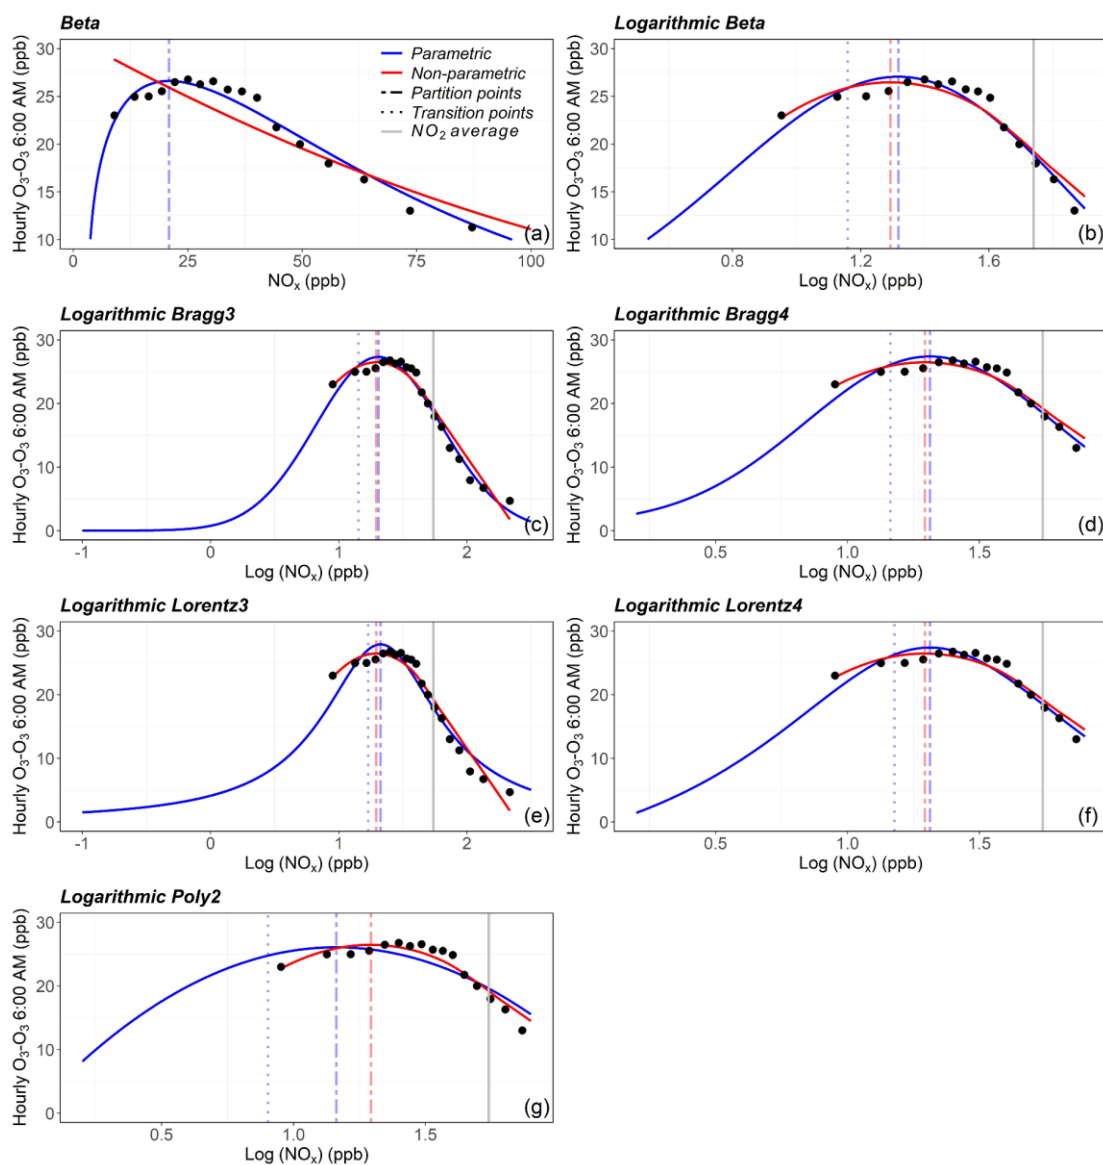

39

40 Figure S7 The  $DPO_3-NO_x$  curves for the Hong Kong (2014-2019) individually fitted  
 41 by the studied models (Equations 1-7)

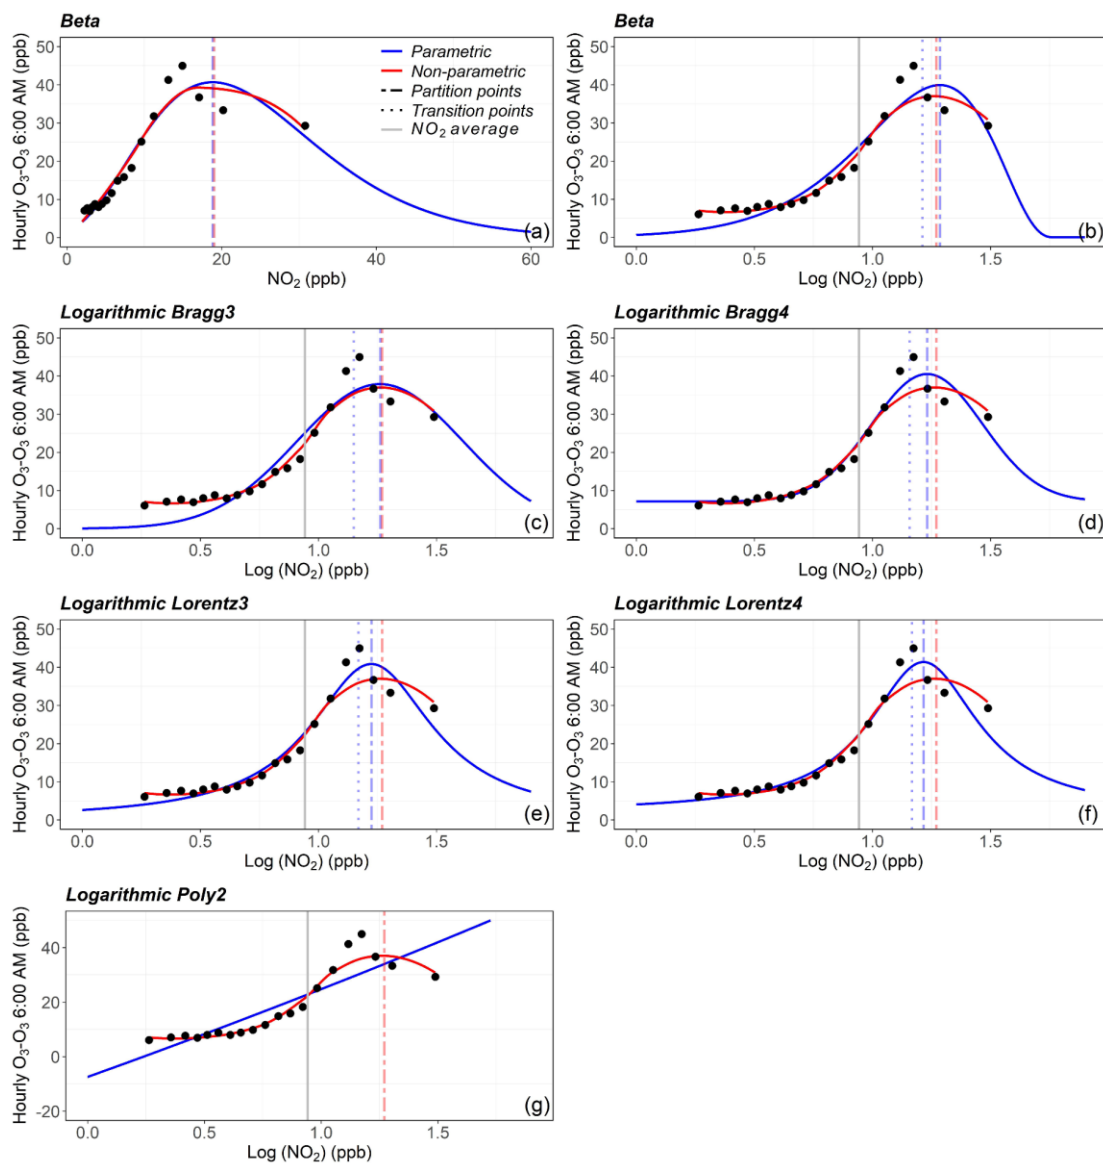

Figure S8 The  $DPO_2$ - $NO_2$  curves for the Macao (2014-2019) individually fitted by the studied models (Equations 1-7)

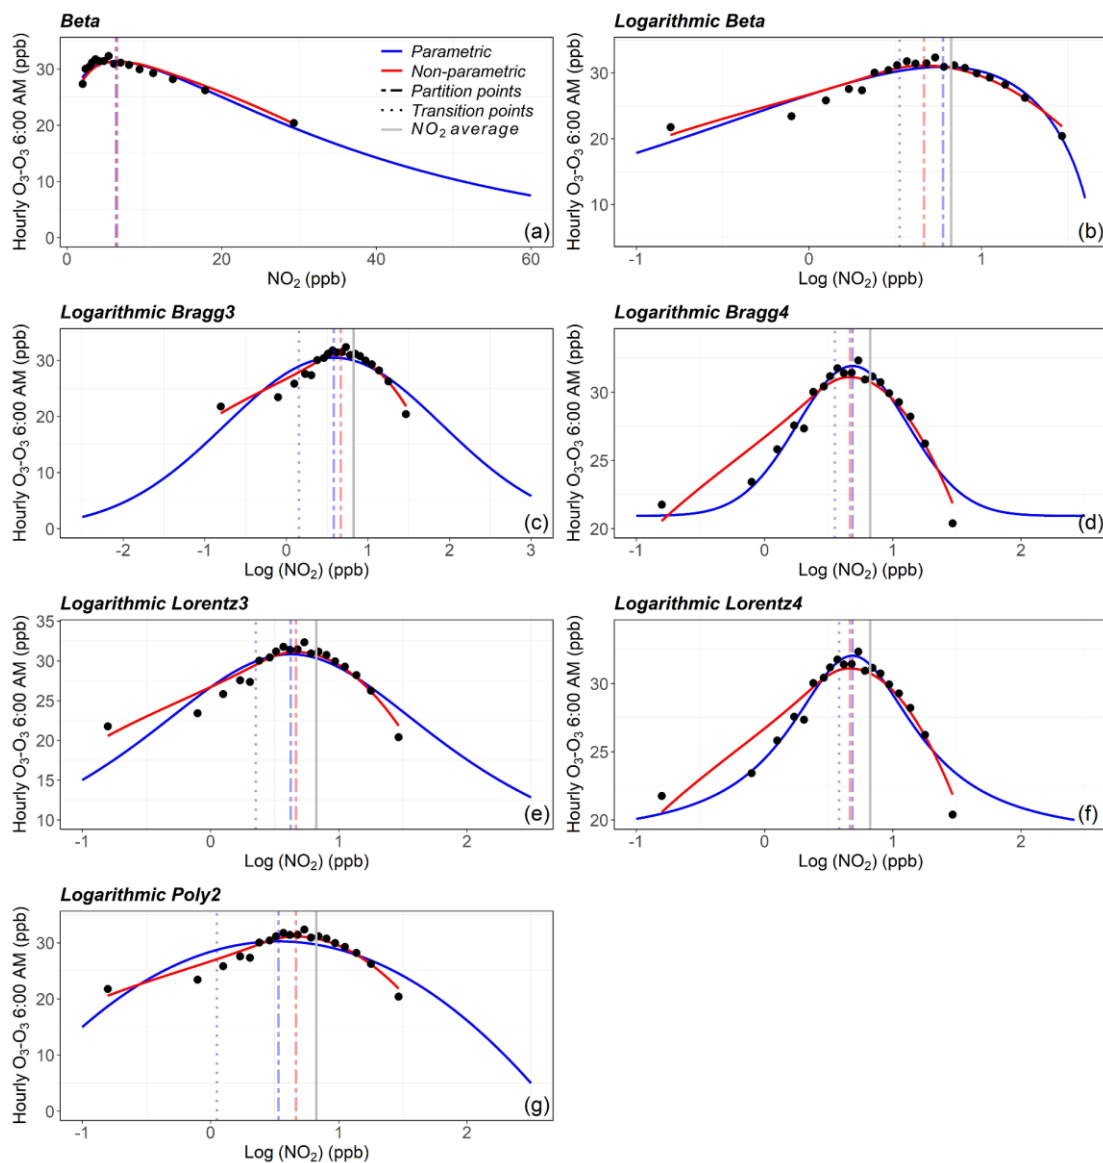

45

46 Figure S9 The **DPO<sub>3</sub>-NO<sub>2</sub>** curves for the **EU and US** (2014-2019) individually fitted

47 by the studied models (Equations 1-7)

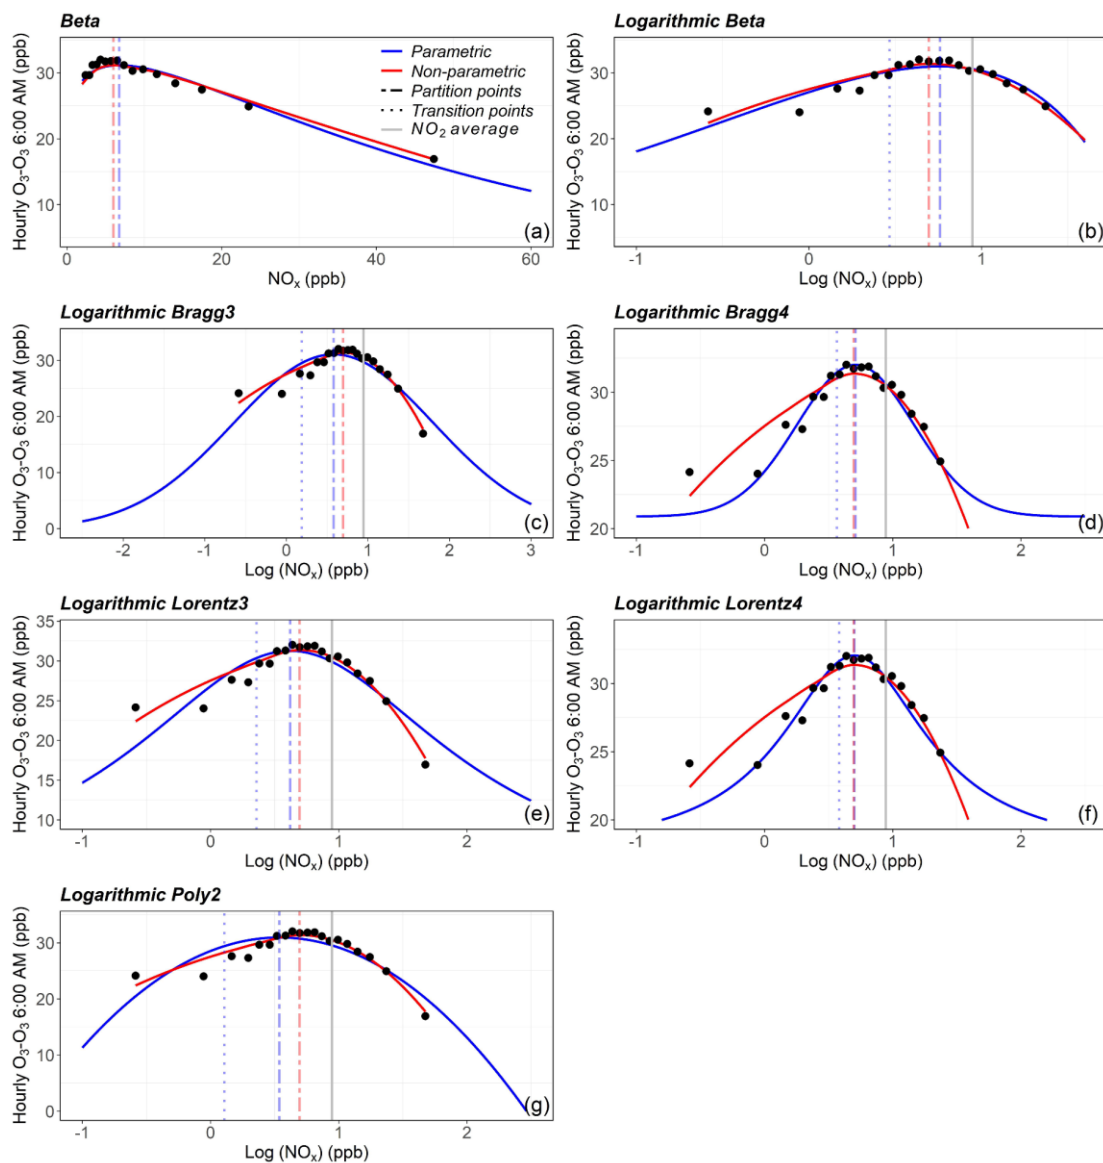

48

49 Figure S10 The **DPO<sub>3</sub>-NO<sub>x</sub>** curves for the **EU and US** (2014-2019) individually fitted  
 50 by the studied models (Equations 1-7)

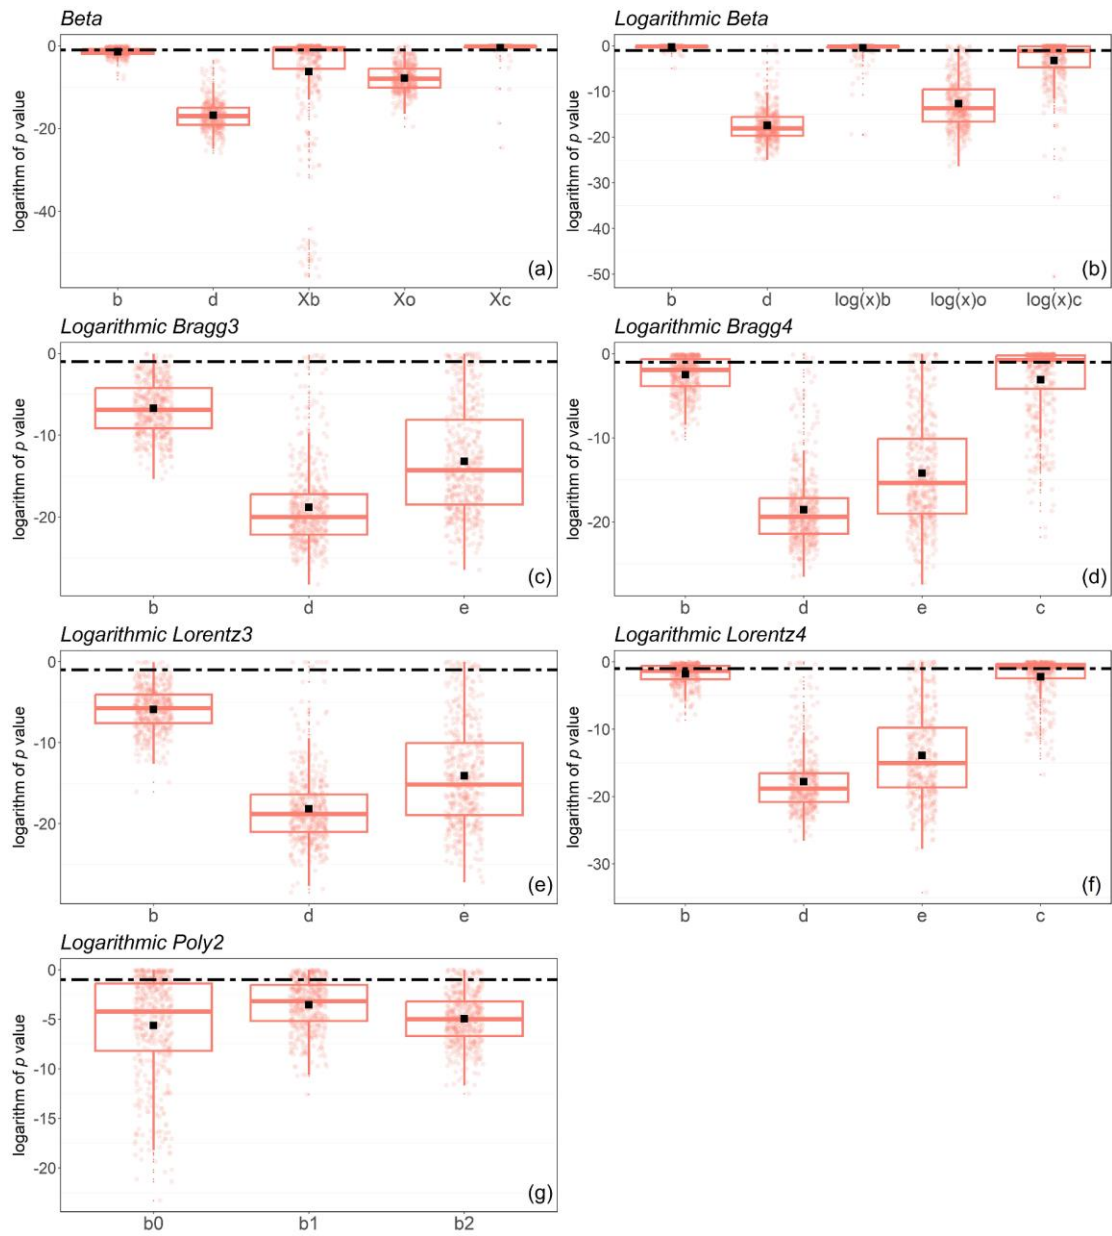

Figure S11 The  $p$ -values per parameters in the convergent and effective DPO<sub>3</sub>-NO<sub>2</sub> fits for **all studied regions**, based on the studied models (Equations 1-7)

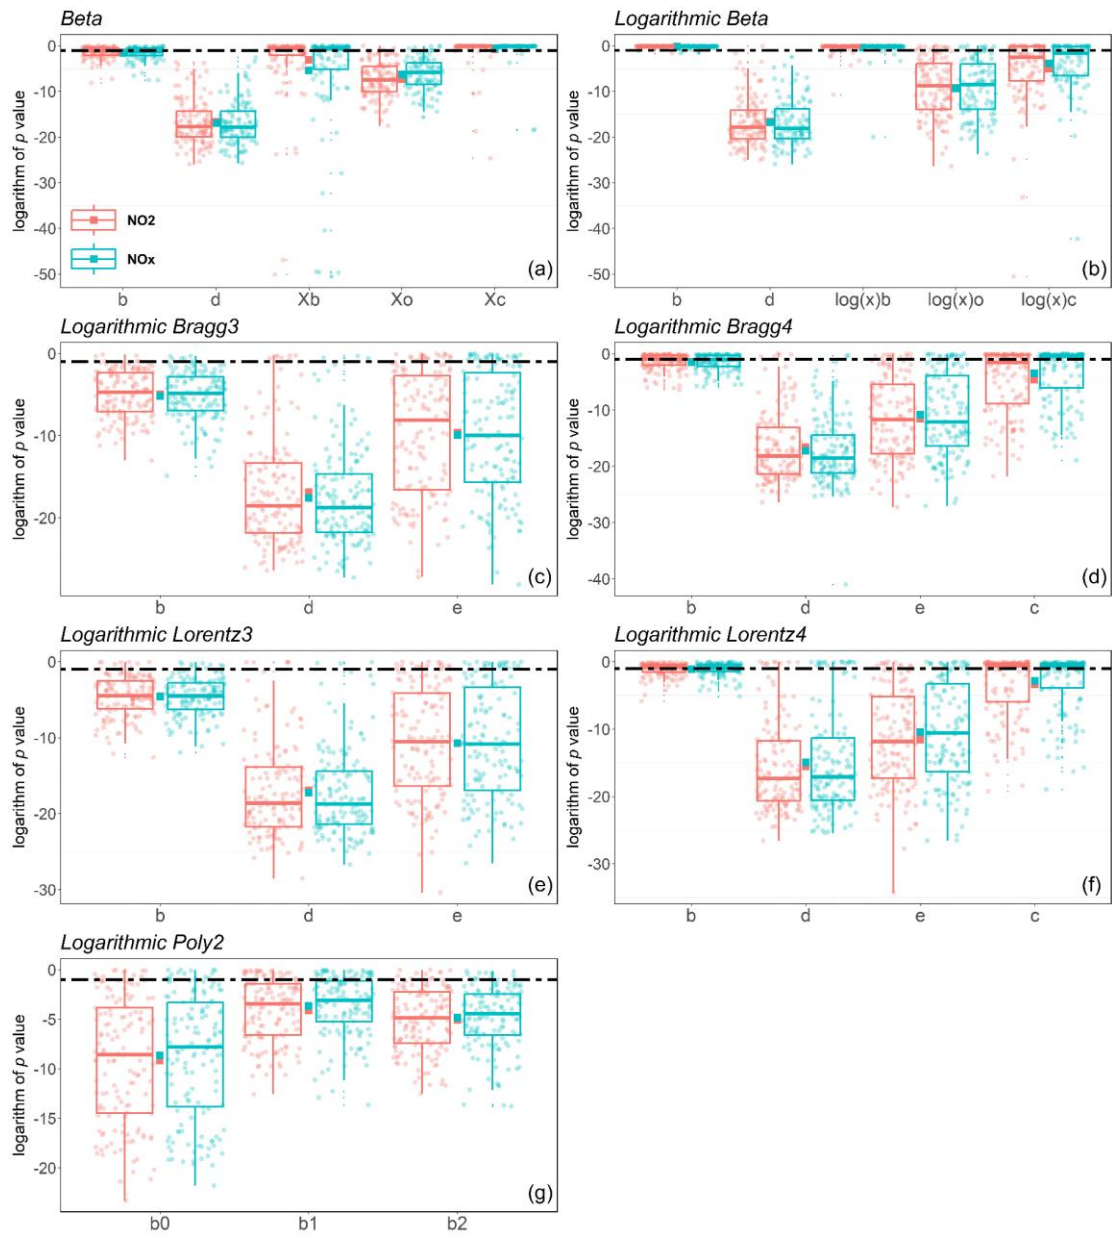

Figure S12 The  $p$ -values per parameters in the convergent and effective DPO<sub>3</sub>-NO<sub>x</sub> (or NO<sub>2</sub>) fits for **Hong Kong, EU and US**, based on the studied models (Equations 1-7)

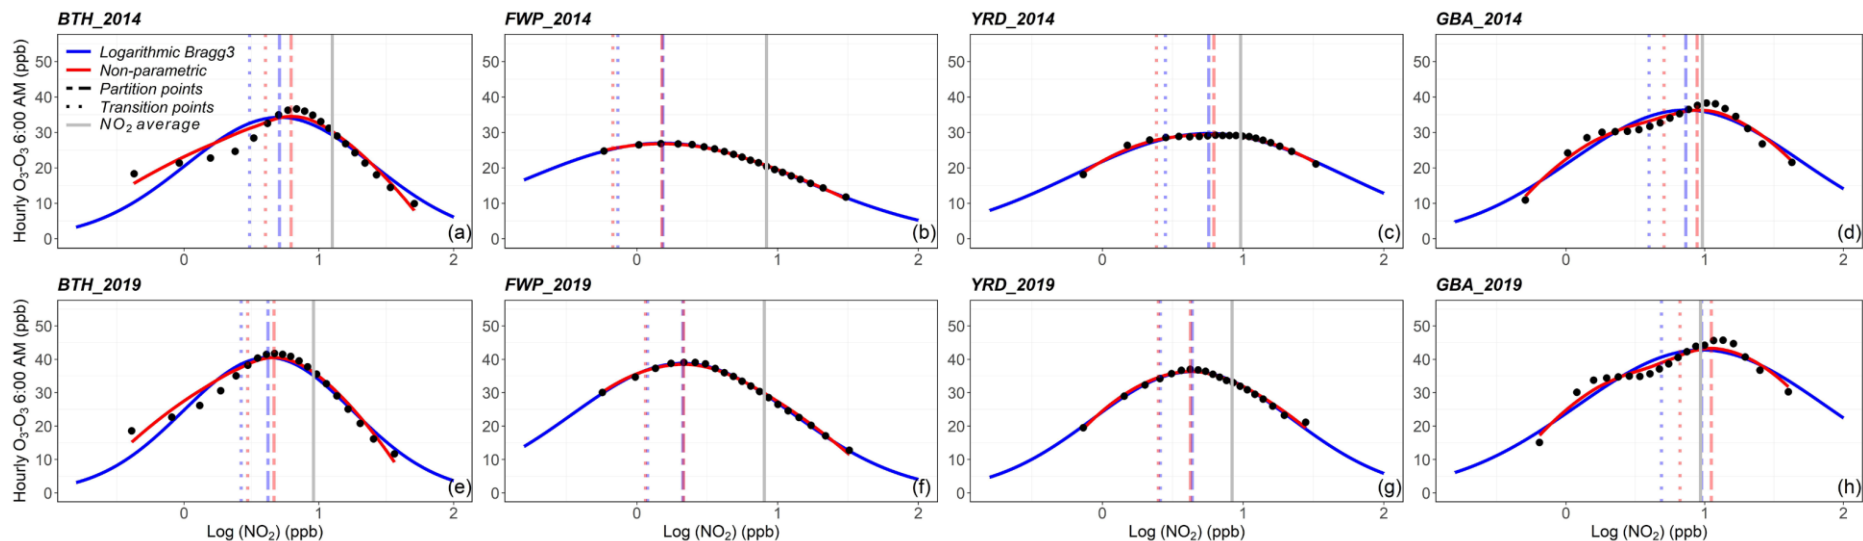

Figure S13 Variations of the DPO<sub>3</sub>-NO<sub>2</sub> curves from 2014 (a-d) to 2019 (e-h) on the regional scale based on the CAQRA gridded data. The gridded data-derived regional DPO<sub>3</sub>/NO<sub>2</sub> ratios (BTH: 2.13 in 2014, 3.43 in 2019; FWP: 2.59, 3.81; YRD: 2.84, 3.74; GBA: 3.45, 4.27) were generally higher compared with the observation data, indicating the DPO<sub>3</sub>-NO<sub>2</sub> curve is also effective for gridded data. The gridded average NO<sub>2</sub> concentrations were lower than observations (Figure 2, Table S1), reflecting inclusion of lower NO<sub>x</sub>-emission areas beyond observation station coverage. In GBA (d, h), observation data were prioritized over gridded data for Hong Kong due to poor NO<sub>2</sub> correlation (with a low five-fold cross-validation  $R^2=0.07$ ) between observation and CAQRA gridded data.

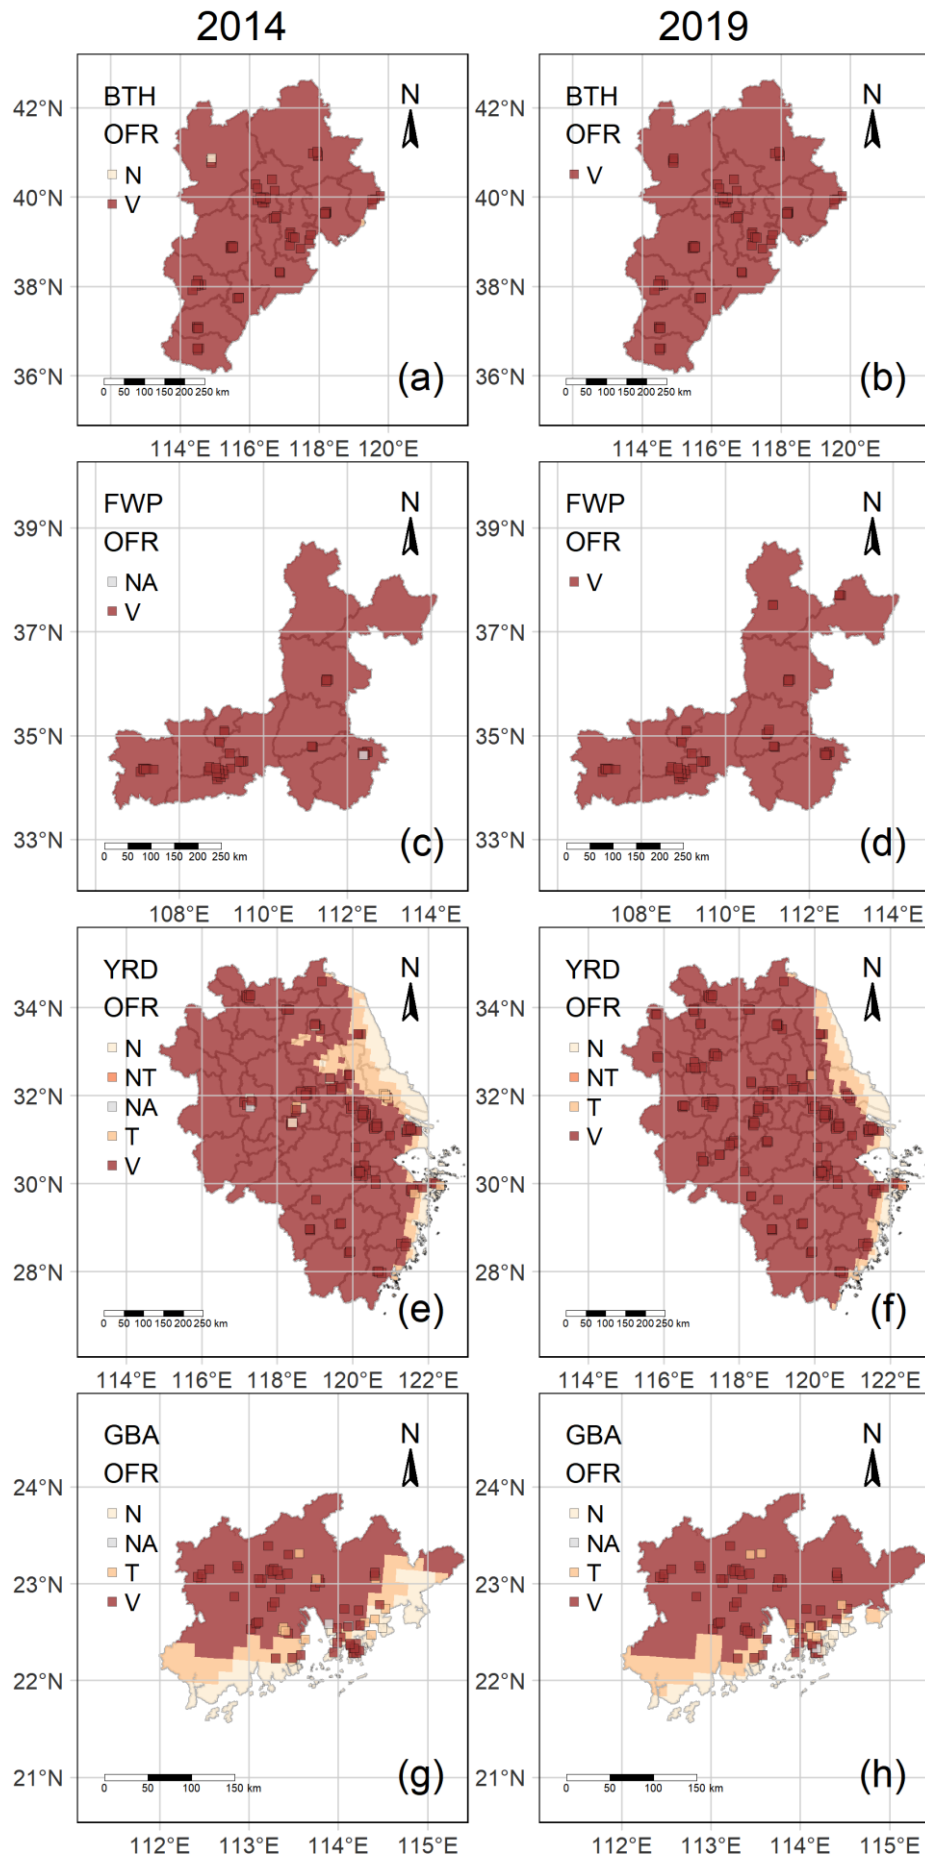



Figure S14 Spatiotemporal variations of the **all-year MDA8-daytime-hour** specific ozone formation regimes (OFRs) from 2014 to 2019 in four city agglomerations of China based on the *logarithmic Bragg 3* model fitting  $\text{DPO}_3$ - $\text{NO}_2$  curves. *N* represented the  $\text{NO}_x$ -limited regime with the stational or gridded average  $\text{NO}_2$  concentration lower than the transition point; *T* represented the transition regime with the stational or gridded average  $\text{NO}_2$  concentration between the transition and partition points; *V* represented the VOC-limited regime with the stational or gridded average  $\text{NO}_2$  concentration higher than the partition point; *NT* denoted the  $\text{NO}_x$ -limited to transition regime, where the  $\text{NO}_x$ -limited and transition regimes cannot be distinguished, as the logarithmic Bragg 3 model fitting curve was irregular (as in Graphical Abstract) but its corresponding linear fit achieved statistical significance ( $p \leq 0.1$ ), with the  $\text{DPO}_3$  monotonically increasing with  $\text{NO}_2$ ; *NA* denoted a non-effective diagnostic result, as the logarithmic Bragg 3 model fitting curve is irregular meanwhile the linear fit is neither statistically significant ( $p > 0.1$ ), or there is no valid (stational or gridded) recording following the meteorological screening.

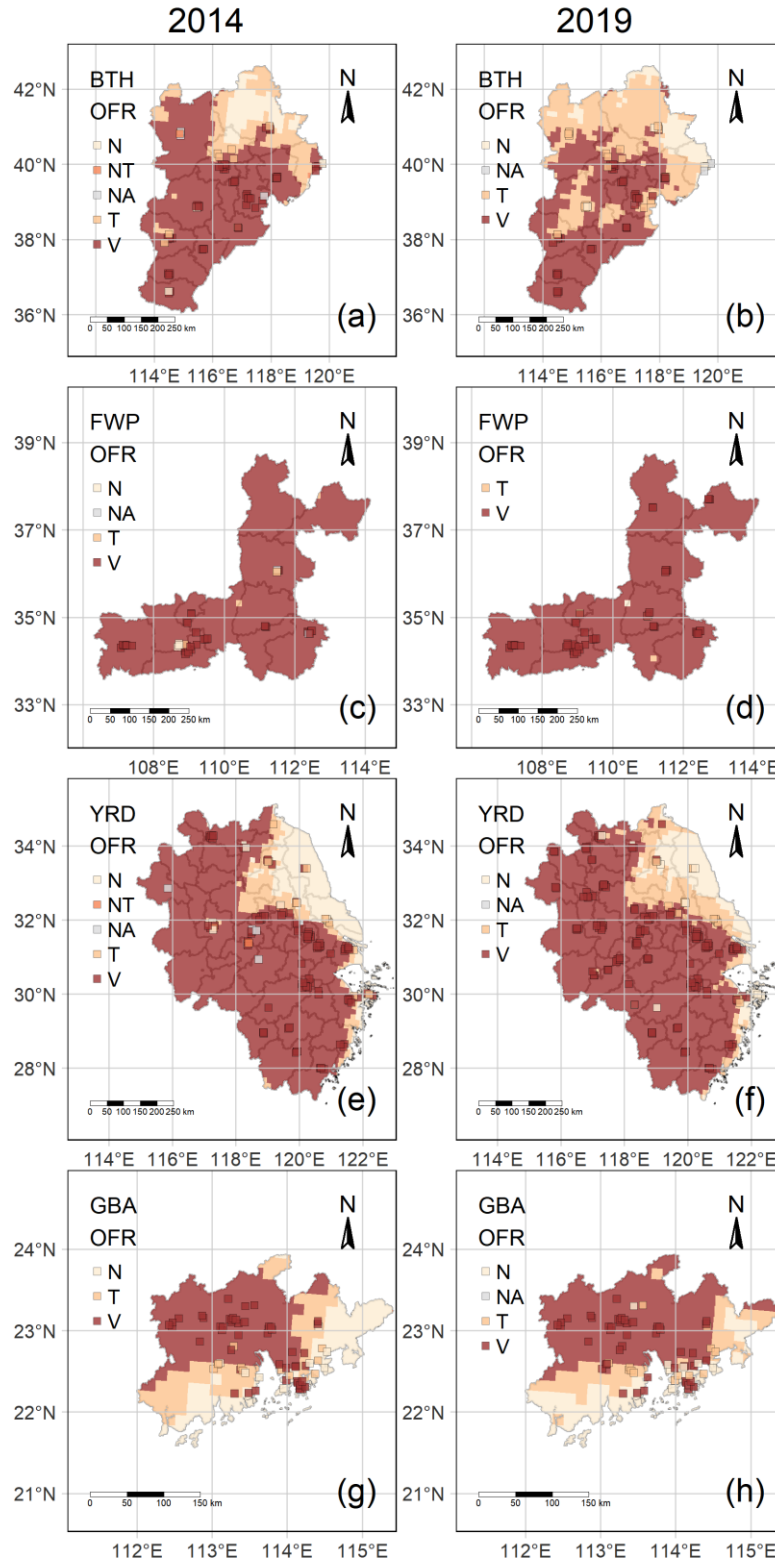

81

82 Figure S15 The same as Figure S12, but for the **ozone-season midday hours** (April-  
 83 September, 13:00-14:00 LT)

84 Table S1 The fitting parameters, average levels (ppb) of NO<sub>2</sub> and DPO<sub>3</sub>, partition points (ppb), transition points (ppb), as well as the proportions  
85 (%) respectively under the VOC-limited, transition and NO<sub>x</sub>-limited regimes specific to **Figure 3**

|                            |                    | BTH   |       | FWP   |       | YRD   |       | GBA   |       | EU    |       | US    |       | EU_US |       |
|----------------------------|--------------------|-------|-------|-------|-------|-------|-------|-------|-------|-------|-------|-------|-------|-------|-------|
|                            |                    | 2014  | 2019  | 2014  | 2019  | 2014  | 2019  | 2014  | 2019  | 2014  | 2019  | 2014  | 2019  | 2014  | 2019  |
| Parameter <i>b</i>         |                    | 1.18  | 2.42  | 0.87  | 1.87  | 1.00  | 1.16  | 0.92  | 1.33  | 0.57  | 0.42  | 0.31  | 0.26  | 0.30  | 0.32  |
| Parameter <i>d</i>         |                    | 45.07 | 53.25 | 34.72 | 54.78 | 38.90 | 45.48 | 39.59 | 47.22 | 10.47 | 9.97  | 31.45 | 30.89 | 30.54 | 30.32 |
| Parameter <i>e</i>         |                    | 0.74  | 0.82  | 0.56  | 0.70  | 0.91  | 0.77  | 0.85  | 1.02  | 0.17  | 0.29  | 0.57  | 0.66  | 0.53  | 0.62  |
| NO <sub>2</sub>            |                    | 18.68 | 15.51 | 15.68 | 15.52 | 15.55 | 14.04 | 18.73 | 17.66 | 8.79  | 7.91  | 7.24  | 5.86  | 7.30  | 5.95  |
| DPO <sub>3</sub>           |                    | 33.16 | 38.61 | 25.54 | 38.09 | 33.95 | 38.11 | 33.16 | 41.22 | 7.71  | 8.29  | 29.15 | 29.23 | 28.22 | 28.40 |
| Partition point            | Logarithmic Bragg3 | 5.45  | 6.60  | 3.62  | 5.06  | 8.23  | 5.84  | 7.03  | 10.60 | 1.48  | 1.97  | 3.74  | 4.61  | 3.42  | 4.16  |
|                            | Non-parametric     | 5.56  | 6.89  | 3.25  | 4.86  | 10.34 | 6.23  | 8.58  | 10.95 | 1.78  | 3.67  | 4.65  | 5.15  | 4.42  | 4.75  |
| Transition point           | Logarithmic Bragg3 | 3.38  | 4.73  | 2.08  | 3.46  | 4.89  | 3.61  | 4.10  | 6.75  | 0.74  | 0.89  | 1.48  | 1.66  | 1.32  | 1.67  |
|                            | Non-parametric     | 2.69  | 5.54  | NA    | 2.96  | 5.74  | 3.24  | 4.18  | 7.28  | 0.80  | 2.31  | 2.35  | 2.56  | 2.26  | 2.42  |
| VOC-limited %              | Logarithmic Bragg3 | 82.29 | 77.63 | 92.41 | 87.72 | 72.10 | 84.63 | 79.74 | 65.10 | 76.43 | 75.88 | 59.00 | 42.79 | 61.42 | 47.68 |
|                            | Non-parametric     | 82.29 | 77.63 | 93.65 | 87.72 | 61.05 | 82.07 | 72.94 | 62.72 | 73.98 | 60.85 | 50.29 | 38.30 | 51.75 | 42.38 |
| Transition %               | Logarithmic Bragg3 | 7.71  | 12.08 | 3.13  | 6.49  | 13.27 | 9.62  | 11.94 | 18.82 | 8.35  | 8.74  | 26.38 | 38.56 | 24.40 | 33.51 |
|                            | Non-parametric     | 8.71  | 12.08 | 6.35  | 8.50  | 22.18 | 12.17 | 18.75 | 18.94 | 9.86  | 11.54 | 23.70 | 29.85 | 22.95 | 27.21 |
| NO <sub>x</sub> -limited % | Logarithmic Bragg3 | 10.00 | 10.29 | 4.46  | 5.78  | 14.63 | 5.75  | 8.31  | 16.07 | 15.22 | 15.38 | 14.62 | 18.65 | 14.18 | 18.81 |
|                            | Non-parametric     | 8.99  | 10.29 | 0     | 3.77  | 16.77 | 5.75  | 8.32  | 18.34 | 16.16 | 27.60 | 26.00 | 31.84 | 25.29 | 30.41 |

87 Table S2 The fitting parameters, average levels (ppb) of NO<sub>2</sub> and DPO<sub>3</sub>, partition points (ppb), transition points (ppb), as well as the proportions  
88 (%) respectively under the VOC-limited, transition and NO<sub>x</sub>-limited regimes specific to **Figure S13**

|                            |                    | BTH   |       | FWP   |       | YRD   |       | GBA   |       |
|----------------------------|--------------------|-------|-------|-------|-------|-------|-------|-------|-------|
|                            |                    | 2014  | 2019  | 2014  | 2019  | 2014  | 2019  | 2014  | 2019  |
| Parameter <i>b</i>         |                    | 1.03  | 1.27  | 0.50  | 0.81  | 0.54  | 0.99  | 0.73  | 0.62  |
| Parameter <i>d</i>         |                    | 34.26 | 40.54 | 26.96 | 38.78 | 29.69 | 36.29 | 36.31 | 46.78 |
| Parameter <i>e</i>         |                    | 0.71  | 0.62  | 0.18  | 0.33  | 0.76  | 0.64  | 0.86  | 0.98  |
| NO <sub>2</sub>            |                    | 12.58 | 9.12  | 8.35  | 8.04  | 9.60  | 8.35  | 9.63  | 9.34  |
| DPO <sub>3</sub>           |                    | 26.75 | 31.27 | 21.62 | 30.67 | 27.30 | 31.25 | 30.99 | 37.19 |
| Partition point            | Logarithmic Bragg3 | 5.11  | 4.20  | 1.53  | 2.13  | 5.71  | 4.36  | 7.30  | 9.49  |
|                            | Non-parametric     | 6.23  | 4.66  | 1.50  | 2.15  | 6.22  | 4.23  | 9.89  | 11.82 |
| Transition point           | Logarithmic Bragg3 | 3.06  | 2.65  | 0.73  | 1.19  | 2.81  | 2.58  | 3.98  | 4.89  |
|                            | Non-parametric     | 4.02  | 2.95  | 0.67  | 1.15  | 2.41  | 2.49  | 5.46  | 7.08  |
| VOC-limited %              | Logarithmic Bragg3 | 67.01 | 61.44 | 86.93 | 77.89 | 61.82 | 66.16 | 44.09 | 34.13 |
|                            | Non-parametric     | 60.70 | 57.72 | 87.23 | 77.60 | 58.46 | 67.26 | 37.70 | 28.61 |
| Transition %               | Logarithmic Bragg3 | 11.76 | 14.06 | 9.10  | 11.76 | 20.77 | 16.15 | 18.72 | 22.18 |
|                            | Non-parametric     | 12.71 | 14.99 | 9.50  | 12.64 | 27.16 | 15.87 | 17.89 | 17.82 |
| NO <sub>x</sub> -limited % | Logarithmic Bragg3 | 21.23 | 24.50 | 3.97  | 10.35 | 17.41 | 17.69 | 37.19 | 43.69 |
|                            | Non-parametric     | 25.59 | 27.29 | 3.27  | 9.76  | 14.38 | 16.87 | 44.41 | 53.57 |
